# Supplementary material for: Properties that rank protein:protein docking poses with high accuracy
Source: Royal Society of Chemistry journal article supplement (doi:10.1039/c8cp03888k), 2018-01-01
Supplement: c8cp03888k1.zip [file c8cp03888k1.zip]

## ESI\_results\_per\_complex: Results per complex of each property's performance in ranking P:P complexes

**Data 1. Ranking performance for the B:B set.** The ranking performance of each property was assessed by the iRMSD of the first ranked pose; the percentages of high-quality poses (%HQ), high- or medium-quality poses (%HQ/MQ), and of incorrect poses (%IP<sub>top</sub>) in the top-*N* predictions; and, finally, the percentage of incorrect poses at the bottom-*M* predictions (%IP<sub>bottom</sub>). The top-*N* and bottom-*M* predictions were defined by the total number of high-quality poses, and the total number of incorrect poses per complex, respectively.

### Part 1. Average results

| property                                        | iRMSd 1 <sup>st</sup> / Å |     | %HQ |     | %IP <sub>top</sub> |     | %HQ/MQ |     | %IP <sub>bottom</sub> |     |
|-------------------------------------------------|---------------------------|-----|-----|-----|--------------------|-----|--------|-----|-----------------------|-----|
|                                                 | av.                       | SEM | av. | SEM | av.                | SEM | av.    | SEM | av.                   | SEM |
| TP                                              | 1.0                       | 0.4 | 75  | 7   | 8                  | 4   | 85     | 7   | 46                    | 6   |
| $\Delta\Delta G_{\text{bind}}^{\text{sum, TP}}$ | 1.0                       | 0.4 | 79  | 6   | 2                  | 2   | 88     | 6   | 54                    | 6   |
| $\Delta G_{\text{bind}}^{\text{P:P}}$           | 0.3                       | 0.1 | 89  | 3   | 4                  | 2   | 96     | 2   | 53                    | 6   |
| iA                                              | 3.1                       | 1.0 | 72  | 8   | 11                 | 5   | 84     | 6   | 40                    | 6   |

### Part 2. Detailed results

| property                                        | complex | iRMSd 1 <sup>st</sup> / Å | %HQ | %IP <sub>top</sub> | %HQ/MQ | %IP <sub>bottom</sub> |
|-------------------------------------------------|---------|---------------------------|-----|--------------------|--------|-----------------------|
| TP                                              | 1BRS    | 0.5                       | 100 | 0                  | 100    | 100                   |
|                                                 | 1Z7X    | 0.7                       | 67  | 33                 | 67     | 40                    |
|                                                 | 1CHO    | 0.8                       | 100 | 0                  | 100    | 40                    |
|                                                 | 3HFM    | 0.0                       | 67  | 17                 | 83     | 40                    |
|                                                 | 1VFB    | 0.9                       | 88  | 0                  | 100    | 33                    |
|                                                 | 1JTG    | 0.6                       | 83  | 0                  | 100    | 60                    |
|                                                 | 1TM1    | 0.6                       | 83  | 0                  | 83     | 60                    |
|                                                 | 1DQJ    | 0.0                       | 83  | 0                  | 100    | 60                    |
|                                                 | 1KTZ    | 0.5                       | 100 | 0                  | 100    | 60                    |
|                                                 | 1F47    | 0.6                       | 67  | 17                 | 67     | 80                    |
|                                                 | 3SGB    | 3.0                       | 50  | 0                  | 50     | 20                    |
|                                                 | 1FCC    | 1.0                       | 83  | 0                  | 100    | 20                    |
|                                                 | 1H9D    | 0.9                       | 100 | 0                  | 100    | 50                    |
|                                                 | 1AK4    | 6.7                       | 0   | 67                 | 0      | 0                     |
|                                                 | 2GOX    | 0.9                       | 33  | 0                  | 100    | 60                    |
|                                                 | 1EMV    | 0.0                       | 67  | 0                  | 100    | 20                    |
|                                                 | 1SMF    | 0.0                       | 100 | 0                  | 100    | 40                    |
| $\Delta\Delta G_{\text{bind}}^{\text{sum, TP}}$ | 1BRS    | 0.5                       | 83  | 0                  | 100    | 80                    |
|                                                 | 1Z7X    | 0.7                       | 100 | 0                  | 100    | 60                    |
|                                                 | 1CHO    | 0.5                       | 100 | 0                  | 100    | 80                    |
|                                                 | 3HFM    | 0.0                       | 100 | 0                  | 100    | 40                    |
|                                                 | 1VFB    | 0.0                       | 75  | 0                  | 100    | 33                    |
|                                                 | 1JTG    | 0.6                       | 83  | 0                  | 100    | 60                    |
|                                                 | 1TM1    | 0.6                       | 83  | 0                  | 83     | 40                    |

|                                       |      |      |     |    |     |     |
|---------------------------------------|------|------|-----|----|-----|-----|
| $\Delta G_{\text{bind}}^{\text{P:P}}$ | 1DQJ | 0.0  | 83  | 0  | 100 | 80  |
|                                       | 1KTZ | 0.5  | 100 | 0  | 100 | 100 |
|                                       | 1F47 | 0.6  | 50  | 0  | 50  | 60  |
|                                       | 3SGB | 3.0  | 50  | 0  | 50  | 40  |
|                                       | 1FCC | 0.8  | 83  | 0  | 100 | 40  |
|                                       | 1H9D | 0.6  | 83  | 0  | 100 | 50  |
|                                       | 1AK4 | 6.7  | 17  | 33 | 17  | 0   |
|                                       | 2GOX | 1.5  | 50  | 0  | 100 | 80  |
|                                       | 1EMV | 0.5  | 100 | 0  | 100 | 40  |
|                                       | 1SMF | 0.0  | 100 | 0  | 100 | 40  |
|                                       | 1BRS | 0.5  | 100 | 0  | 100 | 80  |
|                                       | 1Z7X | 0.7  | 67  | 0  | 100 | 100 |
|                                       | 1CHO | 0.0  | 100 | 0  | 100 | 60  |
|                                       | 3HFM | 0.7  | 100 | 0  | 100 | 20  |
|                                       | 1VFB | 0.0  | 75  | 13 | 88  | 33  |
|                                       | 1JTG | 0.0  | 83  | 0  | 100 | 40  |
|                                       | 1TM1 | 0.4  | 100 | 0  | 100 | 40  |
|                                       | 1DQJ | 0.0  | 67  | 17 | 83  | 40  |
|                                       | 1KTZ | 0.5  | 100 | 0  | 100 | 80  |
|                                       | 1F47 | 0.6  | 83  | 17 | 83  | 20  |
|                                       | 3SGB | 0.0  | 83  | 0  | 100 | 80  |
| $iA$                                  | 1FCC | 1.0  | 83  | 0  | 100 | 60  |
|                                       | 1H9D | 0.0  | 100 | 0  | 100 | 50  |
|                                       | 1AK4 | 0.6  | 83  | 17 | 83  | 40  |
|                                       | 2GOX | 0.0  | 83  | 0  | 100 | 80  |
|                                       | 1EMV | 0.0  | 100 | 0  | 100 | 20  |
|                                       | 1SMF | 0.0  | 100 | 0  | 100 | 60  |
|                                       | 1BRS | 0.5  | 83  | 0  | 100 | 60  |
|                                       | 1Z7X | 0.7  | 100 | 0  | 100 | 40  |
|                                       | 1CHO | 0.8  | 100 | 0  | 100 | 100 |
|                                       | 3HFM | 0.7  | 83  | 17 | 83  | 40  |
|                                       | 1VFB | 0.9  | 75  | 0  | 100 | 33  |
|                                       | 1JTG | 0.6  | 83  | 0  | 100 | 60  |
|                                       | 1TM1 | 0.4  | 100 | 0  | 100 | 60  |
|                                       | 1DQJ | 14.9 | 67  | 17 | 83  | 40  |
|                                       | 1KTZ | 9.0  | 67  | 33 | 67  | 40  |
|                                       | 1F47 | 6.6  | 67  | 33 | 67  | 20  |
|                                       | 3SGB | 7.9  | 0   | 17 | 50  | 40  |
|                                       | 1FCC | 1.0  | 83  | 0  | 100 | 40  |
|                                       | 1H9D | 0.9  | 100 | 0  | 100 | 33  |
|                                       | 1AK4 | 6.7  | 0   | 67 | 0   | 0   |
|                                       | 2GOX | 0.9  | 33  | 0  | 100 | 20  |
|                                       | 1EMV | 0.6  | 100 | 0  | 100 | 0   |
|                                       | 1SMF | 0.0  | 86  | 0  | 86  | 60  |

**Data 2. Ranking performance for the B:U set.** The ranking performance of each property was assessed by the iRMSD of the first ranked pose; the percentages of high-quality poses (%HQ), high- or medium-quality poses (%HQ/MQ), and of incorrect poses (%IP<sub>top</sub>) in the top-*N* predictions; and, finally, the percentage of incorrect poses at the bottom-*M* predictions (%IP<sub>bottom</sub>). The top-*N* and bottom-*M* predictions were defined by the total number of high-quality poses, and the total number of incorrect poses per complex, respectively.

**Part 1. Average results**

| property                                        | iRMSd 1 <sup>st</sup> / Å |     | %HQ |     | %IP <sub>top</sub> |     | %HQ/MQ |     | %IP <sub>bottom</sub> |     |
|-------------------------------------------------|---------------------------|-----|-----|-----|--------------------|-----|--------|-----|-----------------------|-----|
|                                                 | av.                       | SEM | av. | SEM | av.                | SEM | av.    | SEM | av.                   | SEM |
| TP                                              | 0.4                       | 0.2 | 67  | 15  | 2                  | 2   | 98     | 2   | 47                    | 7   |
| $\Delta\Delta G_{\text{bind}}^{\text{sum, TP}}$ | 0.8                       | 0.4 | 52  | 15  | 5                  | 5   | 83     | 11  | 51                    | 8   |
| $\Delta G_{\text{bind}}^{\text{P:P}}$           | 0.3                       | 0.2 | 87  | 10  | 0                  | 0   | 97     | 2   | 39                    | 7   |
| iA                                              | 1.1                       | 0.4 | 57  | 16  | 0                  | 0   | 87     | 10  | 37                    | 8   |

**Part 2. Detailed results**

| property                                        | complex | iRMSd 1 <sup>st</sup> / Å | %HQ | %IP <sub>top</sub> | %HQ/MQ | %IP <sub>bottom</sub> |
|-------------------------------------------------|---------|---------------------------|-----|--------------------|--------|-----------------------|
| TP                                              | 1BRS    | 1.2                       | 0   | 0                  | 100    | 40                    |
|                                                 | 1VFB    | 0.0                       | 100 | 0                  | 100    | 20                    |
|                                                 | 1CHO    | 0.0                       | 100 | 0                  | 100    | 40                    |
|                                                 | 1F47    | 1.3                       | 0   | 0                  | 100    | 80                    |
|                                                 | 3SGB    | 1.2                       | 0   | 0                  | 100    | 67                    |
|                                                 | 1FFW    | 0.0                       | 100 | 0                  | 100    | 40                    |
|                                                 | 1DVF    | 0.0                       | 83  | 0                  | 100    | 83                    |
|                                                 | 1A4Y    | 0.0                       | 100 | 0                  | 100    | 40                    |
|                                                 | 2JEL    | 0.7                       | 83  | 17                 | 83     | 20                    |
|                                                 | 1JTG    | 0.0                       | 100 | 0                  | 100    | 40                    |
| $\Delta\Delta G_{\text{bind}}^{\text{sum, TP}}$ | 1BRS    | 1.3                       | 0   | 0                  | 100    | 40                    |
|                                                 | 1VFB    | 0.0                       | 100 | 0                  | 100    | 20                    |
|                                                 | 1CHO    | 1.1                       | 0   | 0                  | 100    | 80                    |
|                                                 | 1F47    | 3.5                       | 0   | 0                  | 0      | 60                    |
|                                                 | 3SGB    | 1.4                       | 0   | 0                  | 100    | 67                    |
|                                                 | 1FFW    | 0.0                       | 100 | 0                  | 100    | 40                    |
|                                                 | 1DVF    | 0.7                       | 83  | 0                  | 100    | 83                    |
|                                                 | 1A4Y    | 0.0                       | 100 | 0                  | 100    | 60                    |
|                                                 | 2JEL    | 0.0                       | 33  | 50                 | 33     | 0                     |
|                                                 | 1JTG    | 0.0                       | 100 | 0                  | 100    | 60                    |
| $\Delta G_{\text{bind}}^{\text{P:P}}$           | 1BRS    | 0.0                       | 100 | 0                  | 100    | 20                    |
|                                                 | 1VFB    | 0.0                       | 100 | 0                  | 100    | 20                    |
|                                                 | 1CHO    | 0.0                       | 100 | 0                  | 100    | 40                    |
|                                                 | 1F47    | 0.0                       | 100 | 0                  | 100    | 60                    |
|                                                 | 3SGB    | 1.4                       | 0   | 0                  | 100    | 50                    |
|                                                 | 1FFW    | 0.0                       | 100 | 0                  | 100    | 20                    |
|                                                 | 1DVF    | 0.7                       | 83  | 0                  | 83     | 83                    |
|                                                 | 1A4Y    | 0.0                       | 100 | 0                  | 100    | 60                    |

|           |      |     |     |   |     |    |
|-----------|------|-----|-----|---|-----|----|
|           | 2JEL | 0.7 | 83  | 0 | 83  | 20 |
|           | 1JTG | 0.0 | 100 | 0 | 100 | 20 |
| <i>iA</i> | 1BRS | 1.2 | 0   | 0 | 100 | 40 |
|           | 1VFB | 0.0 | 100 | 0 | 100 | 0  |
|           | 1CHO | 1.1 | 0   | 0 | 100 | 40 |
|           | 1F47 | 1.3 | 0   | 0 | 100 | 40 |
|           | 3SGB | 3.0 | 0   | 0 | 0   | 67 |
|           | 1FFW | 0.0 | 100 | 0 | 100 | 40 |
|           | 1DVF | 0.7 | 83  | 0 | 83  | 67 |
|           | 1A4Y | 0.0 | 100 | 0 | 100 | 60 |
|           | 2JEL | 3.2 | 83  | 0 | 83  | 0  |
|           | 1JTG | 0.0 | 100 | 0 | 100 | 20 |

**Data 3. Ranking performance for the U:U set.** The ranking performance of each property was assessed by the iRMSD of the first ranked pose; the percentages of high-quality poses (%HQ), high- or medium-quality poses (%HQ/MQ), and of incorrect poses (%IP<sub>top</sub>) in the top-*N* predictions; and, finally, the percentage of incorrect poses at the bottom-*M* predictions (%IP<sub>bottom</sub>). The top-*N* and bottom-*M* predictions were defined by the total number of high-quality poses, and the total number of incorrect poses per complex, respectively.

### Part 1. Average results

| property                                        | iRMSd 1 <sup>st</sup> / Å |     | %HQ |     | %IP <sub>top</sub> |     | %HQ/MQ |     | %IP <sub>bottom</sub> |     |
|-------------------------------------------------|---------------------------|-----|-----|-----|--------------------|-----|--------|-----|-----------------------|-----|
|                                                 | av.                       | SEM | av. | SEM | av.                | SEM | av.    | SEM | av.                   | SEM |
| TP                                              | 0.5                       | 0.3 | 70  | 15  | 0                  | 0   | 90     | 10  | 58                    | 4   |
| $\Delta\Delta G_{\text{bind}}^{\text{sum, TP}}$ | 1.0                       | 0.7 | 78  | 13  | 10                 | 10  | 90     | 10  | 54                    | 5   |
| $\Delta G_{\text{bind}}^{\text{P:P}}$           | 0.9                       | 0.8 | 90  | 10  | 10                 | 10  | 90     | 10  | 49                    | 6   |
| <i>iA</i>                                       | 1.9                       | 0.8 | 58  | 16  | 23                 | 13  | 58     | 16  | 48                    | 7   |

### Part 2. Detailed results

| property                                        | complex | iRMSd 1 <sup>st</sup> / Å | %HQ | %IP <sub>top</sub> | %HQ/MQ | %IP <sub>bottom</sub> |
|-------------------------------------------------|---------|---------------------------|-----|--------------------|--------|-----------------------|
| TP                                              | 1BRS    | 0.0                       | 100 | 0                  | 100    | 60                    |
|                                                 | 1VFB    | 0.0                       | 100 | 0                  | 100    | 67                    |
|                                                 | 1CHO    | 0.0                       | 100 | 0                  | 100    | 67                    |
|                                                 | 3SGB    | 1.9                       | 0   | 0                  | 100    | 60                    |
|                                                 | 1CBW    | 0.0                       | 100 | 0                  | 100    | 62                    |
|                                                 | 1FFW    | 2.1                       | 0   | 0                  | 0      | 38                    |
|                                                 | 1R0R    | 1.2                       | 0   | 0                  | 100    | 40                    |
|                                                 | 1PPF    | 0.0                       | 100 | 0                  | 100    | 40                    |
|                                                 | 2GUG    | 0.0                       | 100 | 0                  | 100    | 70                    |
|                                                 | 1EAW    | 0.0                       | 100 | 0                  | 100    | 75                    |
| $\Delta\Delta G_{\text{bind}}^{\text{sum, TP}}$ | 1BRS    | 0.0                       | 100 | 0                  | 100    | 60                    |
|                                                 | 1VFB    | 0.0                       | 100 | 0                  | 100    | 56                    |
|                                                 | 1CHO    | 1.3                       | 75  | 0                  | 100    | 67                    |
|                                                 | 3SGB    | 1.9                       | 0   | 0                  | 100    | 60                    |

|                                       |      |     |     |     |     |    |
|---------------------------------------|------|-----|-----|-----|-----|----|
|                                       | 1CBW | 0.0 | 100 | 0   | 100 | 54 |
|                                       | 1FFW | 0.0 | 100 | 0   | 100 | 25 |
|                                       | 1R0R | 0.0 | 100 | 0   | 100 | 80 |
|                                       | 1PPF | 0.0 | 100 | 0   | 100 | 60 |
|                                       | 2GUG | 0.0 | 100 | 0   | 100 | 40 |
|                                       | 1EAW | 6.6 | 0   | 100 | 0   | 38 |
| $\Delta G_{\text{bind}}^{\text{P:P}}$ | 1BRS | 0.0 | 100 | 0   | 100 | 50 |
|                                       | 1VFB | 7.7 | 0   | 100 | 0   | 33 |
|                                       | 1CHO | 0.9 | 100 | 0   | 100 | 83 |
|                                       | 3SGB | 0.0 | 100 | 0   | 100 | 40 |
|                                       | 1CBW | 0.0 | 100 | 0   | 100 | 77 |
|                                       | 1FFW | 0.0 | 100 | 0   | 100 | 25 |
|                                       | 1R0R | 0.0 | 100 | 0   | 100 | 40 |
|                                       | 1PPF | 0.0 | 100 | 0   | 100 | 50 |
|                                       | 2GUG | 0.0 | 100 | 0   | 100 | 40 |
|                                       | 1EAW | 0.0 | 100 | 0   | 100 | 50 |
| $iA$                                  | 1BRS | 0.0 | 100 | 0   | 100 | 40 |
|                                       | 1VFB | 0.0 | 100 | 0   | 100 | 56 |
|                                       | 1CHO | 1.0 | 75  | 25  | 75  | 50 |
|                                       | 3SGB | 3.0 | 0   | 0   | 0   | 80 |
|                                       | 1CBW | 5.5 | 0   | 100 | 0   | 54 |
|                                       | 1FFW | 2.1 | 0   | 0   | 0   | 25 |
|                                       | 1R0R | 0.0 | 100 | 0   | 100 | 20 |
|                                       | 1PPF | 7.1 | 0   | 100 | 0   | 20 |
|                                       | 2GUG | 0.0 | 100 | 0   | 100 | 70 |
|                                       | 1EAW | 0.0 | 100 | 0   | 100 | 63 |

**Data 4. Ranking performance for the B:B set and for the cASM protocol independent of experimental information.** The ranking performance of each property was assessed by the iRMSD of the first ranked pose; the percentages of high-quality poses (%HQ), high- or medium-quality poses (%HQ/MQ), and of incorrect poses (%IP<sub>top</sub>) in the top-*N* predictions; and, finally, the percentage of incorrect poses at the bottom-*M* predictions (%IP<sub>bottom</sub>). The top-*N* and bottom-*M* predictions were defined by the total number of high-quality poses, and the total number of incorrect poses per complex, respectively.

**Part 1. Average results**

| property                                         | iRMSd 1 <sup>st</sup> / Å |     | %HQ |     | %IP <sub>top</sub> |     | %HQ/MQ |     | %IP <sub>bottom</sub> |     |
|--------------------------------------------------|---------------------------|-----|-----|-----|--------------------|-----|--------|-----|-----------------------|-----|
|                                                  | av.                       | SEM | av. | SEM | av.                | SEM | av.    | SEM | av.                   | SEM |
| cHS                                              | 0.9                       | 0.4 | 76  | 5   | 9                  | 3   | 88     | 4   | 43                    | 6   |
| $\Delta\Delta G_{\text{bind}}^{\text{sum, cHS}}$ | 1.3                       | 0.6 | 81  | 5   | 8                  | 3   | 89     | 4   | 50                    | 6   |

**Part 2. Detailed results**

| property                                                           | complex | iRMSd 1 <sup>st</sup> / Å | %HQ | %IP <sub>top</sub> | %HQ/MQ | %IP <sub>bottom</sub> |
|--------------------------------------------------------------------|---------|---------------------------|-----|--------------------|--------|-----------------------|
| <b>cHS</b>                                                         | 1BRS    | 0.0                       | 100 | 0                  | 100    | 80                    |
|                                                                    | 1JTG    | 0.5                       | 83  | 0                  | 100    | 60                    |
|                                                                    | 1VFB    | 0.0                       | 75  | 13                 | 88     | 33                    |
|                                                                    | 1Z7X    | 0.7                       | 83  | 0                  | 100    | 60                    |
|                                                                    | 1CHO    | 0.5                       | 67  | 0                  | 67     | 40                    |
|                                                                    | 3HFM    | 0.7                       | 67  | 33                 | 67     | 20                    |
|                                                                    | 1TM1    | 0.4                       | 100 | 0                  | 100    | 20                    |
|                                                                    | 1DQJ    | 0.0                       | 67  | 17                 | 83     | 40                    |
|                                                                    | 1KTZ    | 0.5                       | 83  | 0                  | 100    | 40                    |
|                                                                    | 1F47    | 0.6                       | 83  | 0                  | 100    | 20                    |
|                                                                    | 1FCC    | 1.0                       | 100 | 0                  | 100    | 80                    |
|                                                                    | 2GOX    | 0.9                       | 50  | 0                  | 100    | 60                    |
|                                                                    | 3SGB    | 1.2                       | 17  | 33                 | 50     | 40                    |
|                                                                    | 1H9D    | 0.6                       | 83  | 17                 | 83     | 17                    |
|                                                                    | 1AK4    | 6.7                       | 67  | 17                 | 67     | 20                    |
|                                                                    | 1EMV    | 0.6                       | 67  | 17                 | 83     | 20                    |
|                                                                    | 1SMF    | 0.0                       | 100 | 0                  | 100    | 80                    |
| <b><math>\Delta\Delta G_{\text{bind}}^{\text{sum, cHS}}</math></b> | 1BRS    | 0.5                       | 100 | 0                  | 100    | 80                    |
|                                                                    | 1JTG    | 0.6                       | 83  | 0                  | 100    | 60                    |
|                                                                    | 1VFB    | 0.9                       | 63  | 13                 | 88     | 33                    |
|                                                                    | 1Z7X    | 0.7                       | 67  | 0                  | 100    | 60                    |
|                                                                    | 1CHO    | 0.0                       | 83  | 0                  | 83     | 40                    |
|                                                                    | 3HFM    | 0.0                       | 83  | 17                 | 83     | 20                    |
|                                                                    | 1TM1    | 0.4                       | 100 | 0                  | 100    | 60                    |
|                                                                    | 1DQJ    | 0.0                       | 83  | 17                 | 83     | 40                    |
|                                                                    | 1KTZ    | 0.5                       | 100 | 0                  | 100    | 40                    |
|                                                                    | 1F47    | 0.6                       | 83  | 17                 | 83     | 40                    |
|                                                                    | 1FCC    | 0.8                       | 83  | 0                  | 100    | 60                    |
|                                                                    | 2GOX    | 1.0                       | 50  | 0                  | 100    | 80                    |
|                                                                    | 3SGB    | 7.9                       | 33  | 33                 | 33     | 60                    |
|                                                                    | 1H9D    | 0.6                       | 100 | 0                  | 100    | 17                    |
|                                                                    | 1AK4    | 6.7                       | 67  | 33                 | 67     | 20                    |
|                                                                    | 1EMV    | 0.5                       | 100 | 0                  | 100    | 40                    |
|                                                                    | 1SMF    | 0.0                       | 100 | 0                  | 100    | 100                   |

**Data 5. Ranking performance for the B:U set and for the cASM protocol independent of experimental information.** The ranking performance of each property was assessed by the iRMSD of the first ranked pose; the percentages of high-quality poses (%HQ), high- or medium-quality poses (%HQ/MQ), and of incorrect poses (%IP<sub>top</sub>) in the top-*N* predictions; and, finally, the percentage of incorrect poses at the bottom-*M* predictions (%IP<sub>bottom</sub>). The top-*N* and bottom-*M* predictions were defined by the total number of high-quality poses, and the total number of incorrect poses per complex, respectively.

**Part 1. Average results**

| property                                         | iRMSd 1 <sup>st</sup> / Å |     | %HQ |     | %IP <sub>top</sub> |     | %HQ/MQ |     | %IP <sub>bottom</sub> |     |
|--------------------------------------------------|---------------------------|-----|-----|-----|--------------------|-----|--------|-----|-----------------------|-----|
|                                                  | av.                       | SEM | av. | SEM | av.                | SEM | av.    | SEM | av.                   | SEM |
| cHS                                              | 0.4                       | 0.2 | 62  | 14  | 2                  | 2   | 92     | 6   | 46                    | 7   |
| $\Delta\Delta G_{\text{bind}}^{\text{sum, cHS}}$ | 0.4                       | 0.2 | 73  | 13  | 2                  | 2   | 95     | 4   | 44                    | 6   |

**Part 2. Detailed results**

| property                                         | complex | iRMSd 1 <sup>st</sup> / Å | %HQ | %IP <sub>top</sub> | %HQ/MQ | %IP <sub>bottom</sub> |
|--------------------------------------------------|---------|---------------------------|-----|--------------------|--------|-----------------------|
| cHS                                              | 3SGB    | 1.4                       | 0   | 0                  | 100    | 80                    |
|                                                  | 1F47    | 0.0                       | 100 | 0                  | 100    | 60                    |
|                                                  | 1FFW    | 0.0                       | 100 | 0                  | 100    | 40                    |
|                                                  | 1DVF    | 0.7                       | 50  | 0                  | 50     | 80                    |
|                                                  | 1A4Y    | 0.0                       | 100 | 0                  | 100    | 40                    |
|                                                  | 1JTG    | 0.0                       | 100 | 0                  | 100    | 40                    |
|                                                  | 2JEL    | 0.0                       | 67  | 17                 | 67     | 20                    |
|                                                  | 1VFB    | 0.0                       | 100 | 0                  | 100    | 40                    |
|                                                  | 1CHO    | 1.1                       | 0   | 0                  | 100    | 20                    |
|                                                  | 1BRS    | 1.2                       | 0   | 0                  | 100    | 40                    |
| $\Delta\Delta G_{\text{bind}}^{\text{sum, cHS}}$ | 3SGB    | 1.4                       | 0   | 0                  | 100    | 40                    |
|                                                  | 1F47    | 0.0                       | 100 | 0                  | 100    | 80                    |
|                                                  | 1FFW    | 0.0                       | 100 | 0                  | 100    | 20                    |
|                                                  | 1DVF    | 0.7                       | 67  | 0                  | 83     | 60                    |
|                                                  | 1A4Y    | 0.0                       | 100 | 0                  | 100    | 40                    |
|                                                  | 1JTG    | 0.0                       | 100 | 0                  | 100    | 60                    |
|                                                  | 2JEL    | 0.7                       | 67  | 17                 | 67     | 20                    |
|                                                  | 1VFB    | 0.0                       | 100 | 0                  | 100    | 40                    |
|                                                  | 1CHO    | 0.0                       | 100 | 0                  | 100    | 40                    |
|                                                  | 1BRS    | 1.2                       | 0   | 0                  | 100    | 40                    |

**Data 6. Ranking performance for the U:U set and for the cASM protocol independent of experimental information.** The ranking performance of each property was assessed by the iRMSD of the first ranked pose; the percentages of high-quality poses (%HQ), high- or medium-quality poses (%HQ/MQ), and of incorrect poses (%IP<sub>top</sub>) in the top-*N* predictions; and, finally, the percentage of incorrect poses at the bottom-*M* predictions (%IP<sub>bottom</sub>). The top-*N* and bottom-*M* predictions were defined by the total number of high-quality poses, and the total number of incorrect poses per complex, respectively.

**Part 1. Average results**

| property                                         | iRMSd 1 <sup>st</sup> / Å |     | %HQ |     | %IP <sub>top</sub> |     | %HQ/MQ |     | %IP <sub>bottom</sub> |     |
|--------------------------------------------------|---------------------------|-----|-----|-----|--------------------|-----|--------|-----|-----------------------|-----|
|                                                  | av.                       | SEM | av. | SEM | av.                | SEM | av.    | SEM | av.                   | SEM |
| cHS                                              | 1.3                       | 0.8 | 65  | 15  | 10                 | 10  | 80     | 13  | 53                    | 5   |
| $\Delta\Delta G_{\text{bind}}^{\text{sum, cHS}}$ | 1.0                       | 0.8 | 78  | 13  | 10                 | 10  | 90     | 10  | 55                    | 6   |

**Part 2. Detailed results**

| property                                         | complex | iRMSd 1 <sup>st</sup> / Å | %HQ | %IP <sub>top</sub> | %HQ/MQ | %IP <sub>bottom</sub> |
|--------------------------------------------------|---------|---------------------------|-----|--------------------|--------|-----------------------|
| cHS                                              | 1BRS    | 0.0                       | 100 | 0                  | 100    | 50                    |
|                                                  | 1VFB    | 7.7                       | 0   | 100                | 0      | 44                    |
|                                                  | 1CHO    | 1.3                       | 50  | 0                  | 100    | 67                    |
|                                                  | 3SGB    | 1.8                       | 0   | 0                  | 100    | 80                    |
|                                                  | 1CBW    | 0.0                       | 100 | 0                  | 100    | 54                    |
|                                                  | 1FFW    | 0.0                       | 100 | 0                  | 100    | 25                    |
|                                                  | 1R0R    | 0.0                       | 100 | 0                  | 100    | 40                    |
|                                                  | 1PPF    | 2.6                       | 0   | 0                  | 0      | 60                    |
|                                                  | 2GUG    | 0.0                       | 100 | 0                  | 100    | 60                    |
|                                                  | 1EAW    | 0.0                       | 100 | 0                  | 100    | 50                    |
| $\Delta\Delta G_{\text{bind}}^{\text{sum, cHS}}$ | 1BRS    | 0.0                       | 100 | 0                  | 100    | 60                    |
|                                                  | 1VFB    | 7.7                       | 0   | 100                | 0      | 44                    |
|                                                  | 1CHO    | 0.9                       | 75  | 0                  | 100    | 67                    |
|                                                  | 3SGB    | 1.8                       | 0   | 0                  | 100    | 60                    |
|                                                  | 1CBW    | 0.0                       | 100 | 0                  | 100    | 54                    |
|                                                  | 1FFW    | 0.0                       | 100 | 0                  | 100    | 13                    |
|                                                  | 1R0R    | 0.0                       | 100 | 0                  | 100    | 80                    |
|                                                  | 1PPF    | 0.0                       | 100 | 0                  | 100    | 60                    |
|                                                  | 2GUG    | 0.0                       | 100 | 0                  | 100    | 50                    |
|                                                  | 1EAW    | 0.0                       | 100 | 0                  | 100    | 63                    |



**Data 7. Ranking performance considering MD generated poses.** The ranking performance of each property was assessed by the iRMSD of the first ranked pose; the percentages of high-quality poses (%HQ), high- or medium-quality poses (%HQ/MQ), and of incorrect poses (%IP<sub>top</sub>) in the top-*N* predictions; and, finally, the percentage of incorrect poses at the bottom-*M* predictions (%IP<sub>bottom</sub>). The top-*N* and bottom-*M* predictions were defined by the total number of high-quality poses, and the total number of incorrect poses per complex, respectively.

| property                                        |            | complex | iRMSD 1 <sup>st</sup> / Å | %HQ | %IP <sub>top</sub> | %HQ/MQ | %IP <sub>bottom</sub> |
|-------------------------------------------------|------------|---------|---------------------------|-----|--------------------|--------|-----------------------|
| TP                                              | HADDOCK    | 1BRS    | 0.0                       | 100 | 0                  | 100    | 60                    |
|                                                 |            | 1R0R    | 1.2                       | 0   | 0                  | 100    | 40                    |
|                                                 | HADDOCK+MD | 1BRS    | 0.0                       | 100 | 0                  | 100    | 60                    |
|                                                 |            | 1R0R    | 1.2                       | 33  | 17                 | 50     | 40                    |
| $\Delta\Delta G_{\text{bind}}^{\text{sum, TP}}$ | HADDOCK    | 1BRS    | 0.0                       | 100 | 0                  | 100    | 60                    |
|                                                 |            | 1R0R    | 0.0                       | 100 | 0                  | 100    | 80                    |
|                                                 | HADDOCK+MD | 1BRS    | 0.0                       | 100 | 0                  | 100    | 60                    |
|                                                 |            | 1R0R    | 0.9                       | 83  | 0                  | 100    | 80                    |
| $\Delta G_{\text{bind}}^{\text{P:P}}$           | HADDOCK    | 1BRS    | 0.0                       | 100 | 0                  | 100    | 50                    |
|                                                 |            | 1R0R    | 0.0                       | 100 | 0                  | 100    | 40                    |
|                                                 | HADDOCK+MD | 1BRS    | 0.0                       | 100 | 0                  | 100    | 50                    |
|                                                 |            | 1R0R    | 0.9                       | 100 | 0                  | 100    | 40                    |
| iA                                              | HADDOCK    | 1BRS    | 0.0                       | 100 | 0                  | 100    | 40                    |
|                                                 |            | 1R0R    | 0.0                       | 100 | 0                  | 100    | 20                    |
|                                                 | HADDOCK+MD | 1BRS    | 1.0                       | 100 | 0                  | 100    | 40                    |
|                                                 |            | 1R0R    | 0.8                       | 100 | 0                  | 100    | 20                    |

**Data 8. Area under the ROC curve (AUC-ROC) and enrichment factor at 10% for each P:P complex.**

| COMPLEX    | AUC-ROC                               |             |                                                  | EF10%                                 |       |                                                  |
|------------|---------------------------------------|-------------|--------------------------------------------------|---------------------------------------|-------|--------------------------------------------------|
|            | $\Delta G_{\text{bind}}^{\text{P:P}}$ | $iA$        | $\Delta\Delta G_{\text{bind}}^{\text{sum, cHS}}$ | $\Delta G_{\text{bind}}^{\text{P:P}}$ | $iA$  | $\Delta\Delta G_{\text{bind}}^{\text{sum, cHS}}$ |
| 2A1A       | 0.98                                  | 0.97        | 0.98                                             | 4.86                                  | 4.32  | 5.14                                             |
| 3A4S       | 0.94                                  | 0.90        | 0.92                                             | 3.66                                  | 2.68  | 3.41                                             |
| 3FN1       | 0.95                                  | 0.97        | 0.98                                             | 8.00                                  | 8.67  | 9.33                                             |
| 3H11       | 0.99                                  | 0.99        | 1.00                                             | 9.73                                  | 8.92  | 9.46                                             |
| 3K75       | 0.90                                  | 0.94        | 0.89                                             | 5.00                                  | 6.00  | 4.00                                             |
| 3PC8       | 0.98                                  | 0.97        | 0.98                                             | 7.14                                  | 6.67  | 7.62                                             |
| 3VLB       | 0.99                                  | 0.96        | 0.98                                             | 9.23                                  | 7.69  | 8.46                                             |
| 4IZ7       | 0.96                                  | 0.92        | 0.93                                             | 8.18                                  | 4.55  | 6.36                                             |
| 2VXT       | 0.99                                  | 0.99        | 0.98                                             | 4.65                                  | 4.42  | 4.42                                             |
| 2W9E       | 0.94                                  | 0.99        | 0.97                                             | 5.50                                  | 8.00  | 7.00                                             |
| 3EOA       | 0.97                                  | 0.97        | 0.97                                             | 4.05                                  | 4.05  | 4.05                                             |
| 3L5W       | 0.94                                  | 0.88        | 0.97                                             | 3.81                                  | 2.50  | 4.29                                             |
| 4DN4       | 0.97                                  | 0.98        | 0.98                                             | 7.07                                  | 6.83  | 7.56                                             |
| 4G6M       | 0.99                                  | 0.99        | 0.99                                             | 7.73                                  | 8.18  | 8.18                                             |
| 1M27       | 0.94                                  | 0.75        | 0.93                                             | 7.46                                  | 0.62  | 7.46                                             |
| 3H2V       | 0.90                                  | 0.83        | 0.83                                             | 5.71                                  | 1.43  | 4.29                                             |
| 1BRS       | 1.00                                  | 1.00        | 1.00                                             | 3.28                                  | 3.28  | 3.28                                             |
| 1AK4       | 0.93                                  | 0.30        | 0.69                                             | 6.00                                  | 0.00  | 0.00                                             |
| 1F47       | 1.00                                  | 0.93        | 0.99                                             | 2.90                                  | 2.17  | 2.90                                             |
| 1CHO       | 1.00                                  | 1.00        | 0.95                                             | 3.17                                  | 3.17  | 2.86                                             |
| 1KTZ       | 1.00                                  | 0.94        | 0.99                                             | 5.13                                  | 3.59  | 4.87                                             |
| 1FCC       | 0.98                                  | 0.93        | 0.98                                             | 2.32                                  | 2.20  | 2.32                                             |
| 3SGB       | 0.91                                  | 0.62        | 0.77                                             | 1.74                                  | 0.64  | 1.19                                             |
| 1VFB       | 0.87                                  | 0.94        | 0.88                                             | 2.14                                  | 2.71  | 2.43                                             |
| 1TM1       | 1.00                                  | 1.00        | 1.00                                             | 4.44                                  | 4.44  | 4.44                                             |
| 1EMV       | 1.00                                  | 1.00        | 1.00                                             | 2.90                                  | 2.90  | 2.90                                             |
| 1SMF       | 1.00                                  | 0.99        | 1.00                                             | 6.90                                  | 6.21  | 6.90                                             |
| 1H9D       | 1.00                                  | 1.00        | 1.00                                             | 2.82                                  | 2.82  | 2.82                                             |
| 2GOX       | 0.91                                  | 0.77        | 0.89                                             | 5.00                                  | 2.00  | 4.00                                             |
| 3HFM       | 0.97                                  | 0.97        | 0.97                                             | 5.86                                  | 5.52  | 5.17                                             |
| 1DQJ       | 0.89                                  | 0.95        | 0.90                                             | 3.26                                  | 3.26  | 3.02                                             |
| 1JTG       | 1.00                                  | 1.00        | 1.00                                             | 3.57                                  | 3.57  | 3.57                                             |
| 1Z7X       | 0.97                                  | 1.00        | 0.95                                             | 3.45                                  | 3.45  | 3.28                                             |
| 2X9A       | 0.99                                  | 1.00        | 0.99                                             | 9.44                                  | 10.00 | 8.89                                             |
| 3BX7       | 0.83                                  | 0.89        | 0.89                                             | 3.51                                  | 3.78  | 3.78                                             |
| 3S9D       | 0.94                                  | 0.96        | 0.95                                             | 5.38                                  | 5.77  | 5.77                                             |
| 4M76       | 0.74                                  | 0.86        | 0.68                                             | 1.56                                  | 2.34  | 0.78                                             |
| 3AAD       | 0.88                                  | 0.90        | 0.91                                             | 4.29                                  | 4.29  | 4.86                                             |
| 3F1P       | 0.89                                  | 0.94        | 0.94                                             | 6.11                                  | 6.11  | 6.67                                             |
| <b>av.</b> | <b>0.95</b>                           | <b>0.92</b> | <b>0.94</b>                                      | -                                     | -     | -                                                |
